# Supplementary material for: Repeated Hand Grip Strength is an Objective Marker for Disability and Severity of Key Symptoms in Post-COVID ME/CFS
Source: bioRxiv or medRxiv preprint supplement (doi:10.1101/2024.01.25.24301776), 2024-01-25
Supplement: Supplementary file [file media-1.pdf]

**Table S1.** Correlations of HGS parameters and clinical parameters.

|                   | Group          | Fmax 1           | Fmax 2           | Fmean 1           | Fmean 2           | Fatigue Ra-<br>tio 1 | Fatigue Ratio<br>2 | Recovery<br>Ratio |
|-------------------|----------------|------------------|------------------|-------------------|-------------------|----------------------|--------------------|-------------------|
| Bell              | PCS-ME/CFS     | $r = 0.34^{**}$  | $r = 0.31^{**}$  | $r = 0.33^{**}$   | $r = 0.29^*$      | $r = -0.2$           | $r = -0.14$        | $r = 0.14$        |
|                   | PCS-Non-ME/CFS | $r = 0.19$       | $r = 0.17$       | $r = 0.17$        | $r = 0.12$        | $r = -0.13$          | $r = 0.01$         | $r = -0.08$       |
| CFQ               | PCS-ME/CFS     | $r = -0.23^*$    | $r = -0.19$      | $r = -0.26^*$     | $r = -0.2$        | $r = 0.16$           | $r = 0.14$         | $r = 0.04$        |
|                   | PCS-Non-ME/CFS | $r = -0.2$       | $r = -0.18$      | $r = -0.21$       | $r = -0.2$        | $r = 0.23$           | $r = 0.19$         | $r = -0.08$       |
| DSQ-PEM           | PCS-ME/CFS     | $r = -0.32^{**}$ | $r = -0.24^*$    | $r = -0.33^{**}$  | $r = -0.27^*$     | $r = 0.32^{**}$      | $r = 0.23$         | $r = -0.02$       |
|                   | PCS-Non-ME/CFS | $r = -0.23$      | $r = -0.23$      | $r = -0.27$       | $r = -0.27$       | $r = 0.24$           | $r = 0.32^*$       | $r = -0.07$       |
| SF-36             |                |                  |                  |                   |                   |                      |                    |                   |
| Physical Function | PCS-ME/CFS     | $r = 0.47^{***}$ | $r = 0.45^{***}$ | $r = 0.53^{***}$  | $r = 0.48^{***}$  | $r = -0.43^{***}$    | $r = -0.31^{**}$   | $r = 0.16$        |
|                   | PCS-Non-ME/CFS | $r = 0.24$       | $r = 0.27^*$     | $r = 0.3^*$       | $r = 0.3^*$       | $r = -0.31^*$        | $r = -0.26^*$      | $r = 0.08$        |
| Role Limitations  | PCS-ME/CFS     | $r = 0.16$       | $r = 0.2$        | $r = 0.21$        | $r = 0.22$        | $r = -0.26^*$        | $r = -0.20$        | $r = 0.12$        |
|                   | PCS-Non-ME/CFS | $r = 0.29^*$     | $r = 0.3^*$      | $r = 0.35^{**}$   | $r = 0.33^{**}$   | $r = -0.3^*$         | $r = -0.29^*$      | $r = 0.07$        |
| Energy            | PCS-ME/CFS     | $r = 0.3^{**}$   | $r = 0.38^{***}$ | $r = 0.34^{**}$   | $r = 0.39^{***}$  | $r = -0.32^{**}$     | $r = -0.13$        | $r = 0.13$        |
|                   | PCS-Non-ME/CFS | $r = 0.14$       | $r = 0.12$       | $r = 0.19$        | $r = 0.15$        | $r = -0.26^*$        | $r = -0.24^*$      | $r = -0.007$      |
| Pain              | PCS-ME/CFS     | $r = 0.19$       | $r = 0.32^{**}$  | $r = 0.26^*$      | $r = 0.33^{**}$   | $r = -0.33^{**}$     | $r = -0.22$        | $r = 0.24^*$      |
|                   | PCS-Non-ME/CFS | $r = 0.28^*$     | $r = 0.38^{**}$  | $r = 0.34^{**}$   | $r = 0.37^{**}$   | $r = -0.35^{**}$     | $r = -0.17$        | $r = 0.1$         |
| COMPASS 31        |                |                  |                  |                   |                   |                      |                    |                   |
| Orthostatic       | PCS-ME/CFS     | $r = -0.21$      | $r = -0.15$      | $r = -0.26^*$     | $r = -0.22$       | $r = 0.3^*$          | $r = 0.3^*$        | $r = -0.03$       |
|                   | PCS-Non-ME/CFS | $r = -0.02$      | $r = 0.05$       | $r = -0.03$       | $r = -0.04$       | $r = 0.32^{**}$      | $r = 0.22^*$       | $r = -0.13$       |
| Vasomotor         | PCS-ME/CFS     | $r = -0.27^*$    | $r = -0.2$       | $r = -0.34^{**}$  | $r = -0.29^*$     | $r = 0.33^{**}$      | $r = 0.34^{**}$    | $r = -0.11$       |
|                   | PCS-Non-ME/CFS | $r = -0.01$      | $r = 0.03$       | $r = -0.06$       | $r = -0.07$       | $r = 0.27^*$         | $r = 0.27^*$       | $r = -0.14$       |
| Secretomotor      | PCS-ME/CFS     | $r = 0.03$       | $r = 0.02$       | $r = -0.06$       | $r = -0.03$       | $r = 0.15$           | $r = 0.15$         | $r = 0.04$        |
|                   | PCS-Non-ME/CFS | $r = 0.03$       | $r = 0.03$       | $r = 0.04$        | $r = 0.01$        | $r = -0.01$          | $r = 0.01$         | $r = -0.13$       |
| Gastrointestinal  | PCS-ME/CFS     | $r = 0.29^*$     | $r = 0.28^*$     | $r = 0.21$        | $r = 0.25^*$      | $r = -0.12$          | $r = -0.13$        | $r = 0.13$        |
|                   | PCS-Non-ME/CFS | $r = -0.15$      | $r = -0.1$       | $r = -0.14$       | $r = -0.1$        | $r = 0.04$           | $r = 0.05$         | $r = 0.11$        |
| Bladder           | PCS-ME/CFS     | $r = 0.19$       | $r = 0.16$       | $r = 0.16$        | $r = 0.19$        | $r = -0.12$          | $r = -0.1$         | $r = 0.06$        |
|                   | PCS-Non-ME/CFS | $r = 0.15$       | $r = 0.15$       | $r = 0.14$        | $r = 0.16$        | $r = 0.03$           | $r = -0.03$        | $r = 0.22$        |
| Pupillomotor      | PCS-ME/CFS     | $r = -0.15$      | $r = -0.09$      | $r = -0.1$        | $r = -0.1$        | $r = -0.08$          | $r = 0.13$         | $r = -0.04$       |
|                   | PCS-Non-ME/CFS | $r = -0.04$      | $r = 0.01$       | $r = -0.04$       | $r = -0.02$       | $r = 0.1$            | $r = 0.17$         | $r = 0.16$        |
| Symptom Severity  | PCS-ME/CFS     | $r = 0.26^*$     | $r = 0.35^{**}$  | $r = 0.27^*$      | $r = 0.32^{**}$   | $r = -0.28^*$        | $r = 0.9$          | $r = 0.16$        |
|                   | PCS-Non-ME/CFS | $r = 0.04$       | $r = 0.01$       | $r = 0.08$        | $r = 0.04$        | $r = -0.08$          | $r = -0.02$        | $r = -0.08$       |
| Muscle pain       | PCS-ME/CFS     | $r = -0.2$       | $r = -0.22$      | $r = -0.26^*$     | $r = -0.27^*$     | $r = 0.24^*$         | $r = 0.3^{**}$     | $r = -0.05$       |
|                   | PCS-Non-ME/CFS | $r = -0.1$       | $r = -0.16$      | $r = -0.17$       | $r = -0.19$       | $r = 0.21$           | $r = 0.23$         | $r = -0.02$       |
| Headache          | PCS-ME/CFS     | $r = -0.06$      | $r = -0.12$      | $r = -0.06$       | $r = -0.1$        | $r = 0.05$           | $r = 0.09$         | $r = -0.02$       |
|                   | PCS-Non-ME/CFS | $r = -0.04$      | $r = -0.1$       | $r = -0.11$       | $r = -0.06$       | $r = 0.32^{**}$      | $r = -0.07$        | $r = 0.1$         |
| Joint pain        | PCS-ME/CFS     | $r = -0.33^{**}$ | $r = -0.34^{**}$ | $r = -0.43^{***}$ | $r = -0.41^{***}$ | $r = 0.43^{***}$     | $r = 0.36^{**}$    | $r = -0.09$       |
|                   | PCS-Non-ME/CFS | $r = -0.009$     | $r = -0.17$      | $r = -0.13$       | $r = -0.19$       | $r = 0.32^*$         | $r = 0.24$         | $r = -0.07$       |
| Fatigue Score     | PCS-ME/CFS     | $r = -0.35^{**}$ | $r = -0.42^{**}$ | $r = -0.46^{**}$  | $r = -0.46^{**}$  | $r = 0.39^{**}$      | $r = 0.28^*$       | $r = -0.07$       |
|                   | PCS-Non-ME/CFS | $r = -0.044$     | $r = -0.06$      | $r = -0.11$       | $r = -0.11$       | $r = 0.32^*$         | $r = 0.27^*$       | $r = -0.02$       |
| Cognitive Score   | PCS-ME/CFS     | $r = -0.22$      | $r = -0.26^*$    | $r = -0.27^*$     | $r = -0.3^{**}$   | $r = 0.24^*$         | $r = 0.28^*$       | $r = -0.17$       |
|                   | PCS-Non-ME/CFS | $r = -0.2$       | $r = -0.15$      | $r = -0.16$       | $r = -0.12$       | $r = 0.09$           | $r = 0.05$         | $r = 0.03$        |
| Immune Score      | PCS-ME/CFS     | $r = -0.16$      | $r = -0.26^*$    | $r = -0.24^*$     | $r = -0.31^{**}$  | $r = 0.24^*$         | $r = 0.34^{**}$    | $r = -0.17$       |
|                   | PCS-Non-ME/CFS | $r = -0.008$     | $r = -0.04$      | $r = -0.03$       | $r = -0.09$       | $r = 0.3^*$          | $r = 0.25$         | $r = -0.14$       |

Asterisks mark significant correlations (Spearman Correlation, \*  $p < 0.05$ , \*\*  $p < 0.01$ , \*\*\* $p < 0.001$  \*\*\*).

CFQ; Chalder Fatigue Scale; COMPASS 31; Composite Autonomic Symptom Score; Fatigue Ratio 1/2, Ratio of Fmax/Fmean of the first/second session; Fmax 1/2, maximum hand grip strength of the first/second session; Fmean 1/2, mean hand grip strength of the first/second session; ME/CFS, Myalgic Encephalomyelitis/Chronic Fatigue Syndrome; PCS, Post-COVID Syndrome; PEM-DSQ; De Paul Symptom Questionnaire for Post Exertional Malaise; Recovery Ratio, Ratio of Fmean2/Fmean1, SF-36, Short-Form 36 Health Survey
